# Supplementary material for: Thiacalix[4]tube: synthesis, X-ray crystal structure and preliminary binding studies Electronic supplementary information (ESI) available: full experimental details, including synthesis and characterisation of 4 and 5, and the crystallographic study of 6. See http://www.rsc.org/suppdata/nj/b1/b106094p/
Source: Royal Society of Chemistry journal article supplement (doi:10.1039/b106094p), 2001-10-17
Supplement: b106094p.doc [file b106094p.doc]

**Electronic Supplementary Information**

**Experimental**

All chemicals were commercial grade and used without further purification unless otherwise stated. Solvents were pre-dried, purified by distillation and stored under nitrogen where appropriate. Xylene was stored over calcium hydride and triethylamine was distilled from potassium hydroxide.

Nuclear magnetic resonance spectra were recorded using either a 300 MHz Varian VXWorks spectrometer or a 500 MHz Varian Unity spectrometer. MALDI mass spectra were obtained from the EPSRC mass spectrometry service of University College, Swansea or were recorded using a Micromass TofSpec 2E Reflectron MALDI MS.

**Syntheses**

**Tetrakis(2-hydroxyethoxy)-*p*-*t*-butyl thiacalix[4]arene (4).** Tetraethyl-*p*-*tert*-butylthiacalix[4]arene tetraacetate (**3**; 1.5 g, 1.41 mmol) in diethyl ether (15 ml) was added dropwise to a cooled solution of LiAlH4 (420 mg, 11 mmol) in diethyl ether (15 ml) and the resulting mixture stirred for 3–4 h (reaction monitored by TLC, ethyl acetate–hexane 3:2). The reaction was quenched by careful addition of 10% HCl and chloroform. The organic layer was separated, washed with 10% HCl, water and the solvent removed *in vacuo* to yield a white foam. Column chromatography (ethyl acetate–hexane 3:2) gave **4** as a white solid (48% yield). 1H NMR (300 MHz, [D]CHCl3, 18 C):  = 1.08 [s, 36H; (CH3)3], 3.98 (br t, 8H, CH2OH), 4.29 (br s, 8H; CH2O), 4.98 (br t, 4H; OH), 7.33 (s, 8H; Ar-H); 13C NMR (75 MHz, [D]CHCl3, 18 C):  = 31.09 [(CH3)]), 34.22 [C(CH3)3], 61.51 (OCH2), 79.16 (HOCH2), 129.66 (Ar), 134.61 (Ar-H), 147.20 (Ar-C), 158.21 (Ar); MS (MALDI): *m/z* 919.83 [M + Na]+.

**Tetrakis[(4-methylphenyl)sulfonyloxyethoxy]-*p*-*tert*-butylthiacalix[4]arene (5).** *p*-Toluenesulfonyl chloride (1.1 g, 5.8 mmol) was added to a solution of 600 mg (0.68 mmol) tetrakis(2-hydroxyethoxy)-*p*-*tert*-butylthiacalix[4]arene (**4**) in dichloromethane at 0 C. Triethylamine (1.2 ml) was added and the solution stirred for 18 h. The solution was washed with 1 N HCl and brine and then dried. Evaporation of the solvent yielded a crude product, which was purified by crystallisation from dichloromethane–ethanol to give the desired compound as a white solid (62%) 1H NMR (300 MHz, [D]CHCl3, 18 C):  = 1.04 [s, 36H; (CH3)3], 2.41 (Ar-CH3), 4.29 (t, *J* = 8.5 Hz, 8H, ArOCH2), 4.46 (t, *J* = 8.5 Hz, 8H; SO3CH2), 7.19 (s, 8H; Ar-H), 7.32 (d, *J* = 8 Hz, 8H, tosyl 2,4), 7.77 (d, *J* = 8Hz, 8H, tosyl 3,5); 13C NMR (75 MHz, [D]CHCl3, 18 C):  = 21.66 (Ar-CH3), 31.07 [(CH3)3], 34.10 [C(CH3)3], 69.34 (SO3CH2), 72.46 (OCH2), 128.05 (tosyl 3,5), 129.52 (Ar), 129.89 (tosyl 2,4), 133.01 (Ar) 134.00 (Ar-H), 144.73 (Ar-C), 146.74 (Ar) 158.08 (Ar-O); MS (MALDI): *m/z* 1535.28 [M + Na]+.

# X-ray crystallography

Intensity data were collected with MoKa radiation using the MARresearch Image Plate System. The crystal was positioned at 70 mm from the Image Plate. 100 frames were measured at 2º intervals with a counting time of 10 min to give 8246 reflections of which 4661 were independent [R(int) = 0.0823]. Data analysis was carried out with the XDS program.1 The structure was solved using direct methods with the SHELX86 program.2 The molecule has crystallographic 2/*m* symmetry. Two of the –O–CH2–CH2–O– links between the two calixarenes are disordered with the carbon atoms taking up two possible positions. The non-hydrogen atoms were refined with anisotropic thermal parameters. The hydrogen atoms were included in geometric positions and given thermal parameters equivalent to 1.2 times those of the atom to which they were attached. The structure was refined on *F*2 using SHELXL.3 The final *R* values were *R*1 0.1054 and *R*2 0.2254 for 3527 data with *I* > 2 **(*I*).

## References

1. W. Kabsch, *J. Appl. Crystallogr*., 1988, **21**, 916.

2. SHELX86: G. M. Sheldrick, *Acta Crystallogr., Sect. A,* 1990, **46**, 467.

3. G. M.Sheldrick, *SHELXL, Program for Crystal Structure Refinement,* University of Göttingen.Göttingen, Germany, 1993.
